# Supplementary material for: Genistein Co-Amorphous Systems with Amino Acids: An Investigation into Enhanced Solubility and Biological Activity
Source: MDPI journal article supplement (doi:10.3390/pharmaceutics15122653), 2023-11-21
Supplement: s1 [file s1]

*Supplementary materials*

# Genistein Co-Amorphous Systems with Amino Acids: An Investigation into Enhanced Solubility and Biological Activity

Ewa Garbiec <sup>1</sup>, Natalia Rosiak <sup>1</sup>, Przemysław Zalewski <sup>1</sup>, Lidia Tajber <sup>2</sup> and Judyta Cielecka-Piontek <sup>1,\*</sup>

<sup>1</sup> Department of Pharmacognosy and Biomaterials, Poznan University of Medical Sciences, 3 Rokietnicka St., 60-806 Poznan, Poland; ewa.garbiec@student.ump.edu.pl (E.G.); nrosiak@ump.edu.pl (N.R.); pzalewski@ump.edu.pl (P.Z.)

<sup>2</sup> School of Pharmacy and Pharmaceutical Sciences, Trinity College Dublin, University of Dublin, Dublin 2, D02 PN40 Ireland; ltajber@tcd.ie

\* Correspondence: jpiontek@ump.edu.pl

Table S1. Binding energies of GEN-amino acid systems generated, with the 20 systems ranked in order of increasing energy. The five most energetically favorable systems are highlighted in green.

| Amino acid    | Type         | Binding Energy (kcal·Mol <sup>-1</sup> ) |
|---------------|--------------|------------------------------------------|
| lysine        | Basic AA     | -2.58                                    |
| arginine      | Basic AA     | -1.96                                    |
| tryptophan    | Non-polar AA | -1.91                                    |
| tyrosine      | Polar AA     | -1.84                                    |
| glutamine     | Polar AA     | -1.83                                    |
| phenylalanine | Non-polar AA | -1.73                                    |
| isoleucine    | Non-polar AA | -1.69                                    |
| glutamic acid | Acidic AA    | -1.56                                    |
| leucine       | Non-polar AA | -1.55                                    |
| histidine     | Basic AA     | -1.5                                     |
| asparagine    | Polar AA     | -1.35                                    |
| methionine    | Non-polar AA | -1.33                                    |
| proline       | Non-polar AA | -1.3                                     |
| alanine       | Non-polar AA | -1.12                                    |
| threonine     | Polar AA     | -1.12                                    |
| serine        | Polar AA     | -1.11                                    |
| aspartic acid | Acidic AA    | -1.07                                    |
| valine        | Non-polar AA | -1.06                                    |
| cysteine      | Polar AA     | -0.88                                    |
| glycine       | Non-polar AA | -0.88                                    |

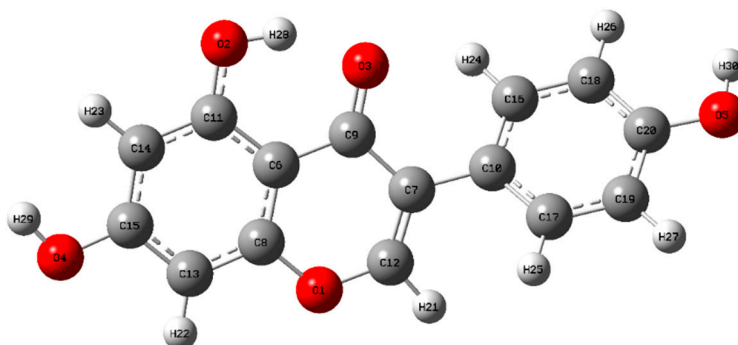

Optimized geometry of the GEN.

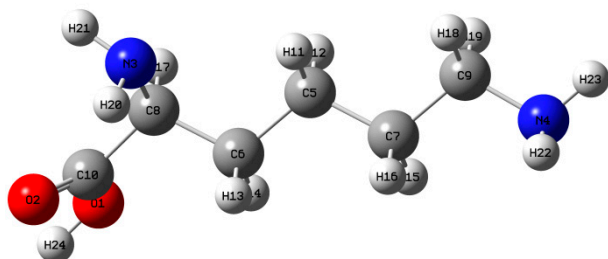

Optimized geometry of the LYS.

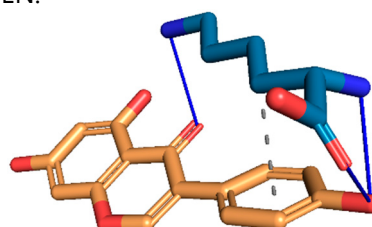

Interaction of GEN with LYS  
(−2.58 kcal·Mol<sup>-1</sup>).

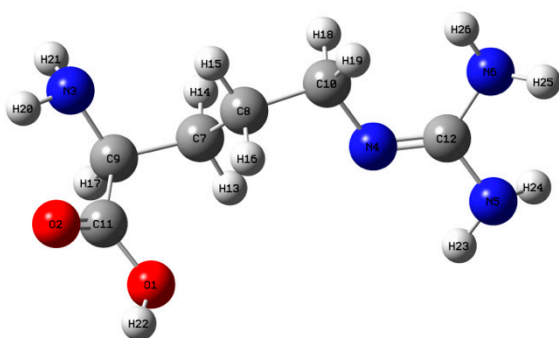

Optimized geometry of the ARG.

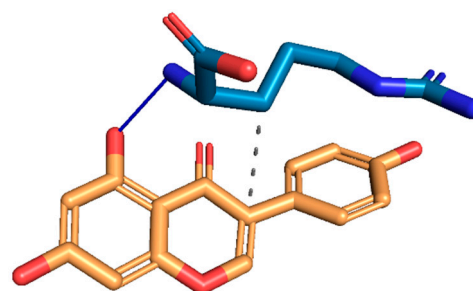Interaction of GEN with ARG  
( $-1.96 \text{ kcal}\cdot\text{Mol}^{-1}$ ).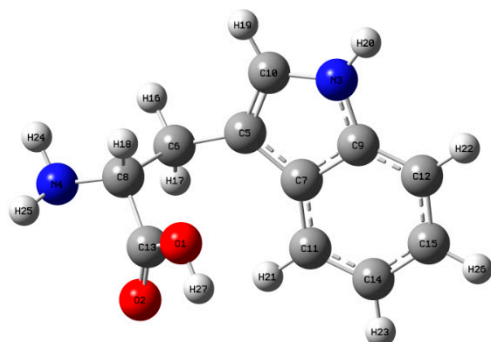

Optimized geometry of the TRP.

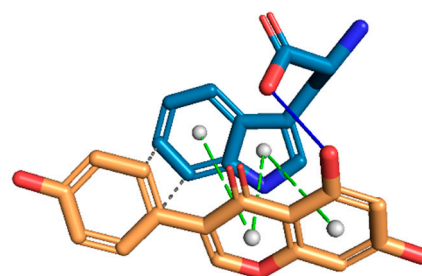Interaction of GEN with TRP  
( $-1.91 \text{ kcal}\cdot\text{Mol}^{-1}$ ).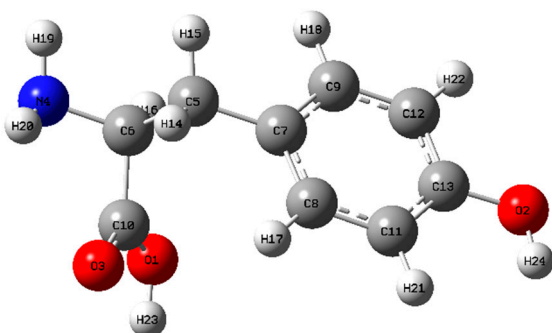

Optimized geometry of the TYR.

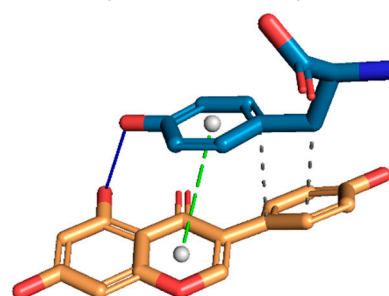Interaction of GEN with TYR  
( $-1.84 \text{ kcal}\cdot\text{Mol}^{-1}$ ).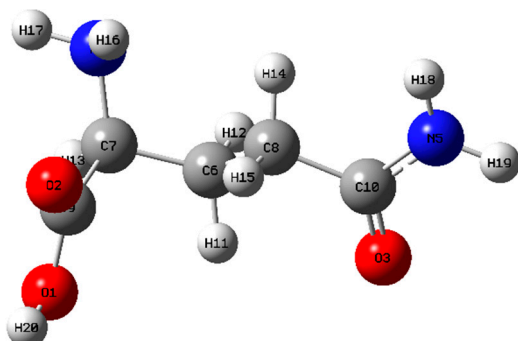

Optimized geometry of the GLU.

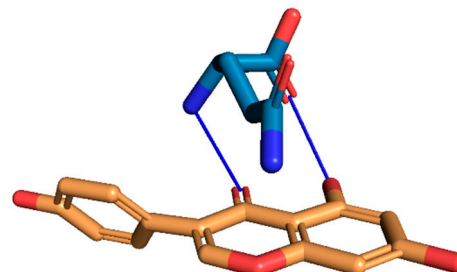Interaction of GEN with GLU  
( $-1.83 \text{ kcal}\cdot\text{Mol}^{-1}$ ).

Figure S1. Optimized geometry of GEN, LYS, ARG, TRP, TYR and GLU (images were generated with GaussView) and interactions of GEN with amino acids (images were generated with PyMol).

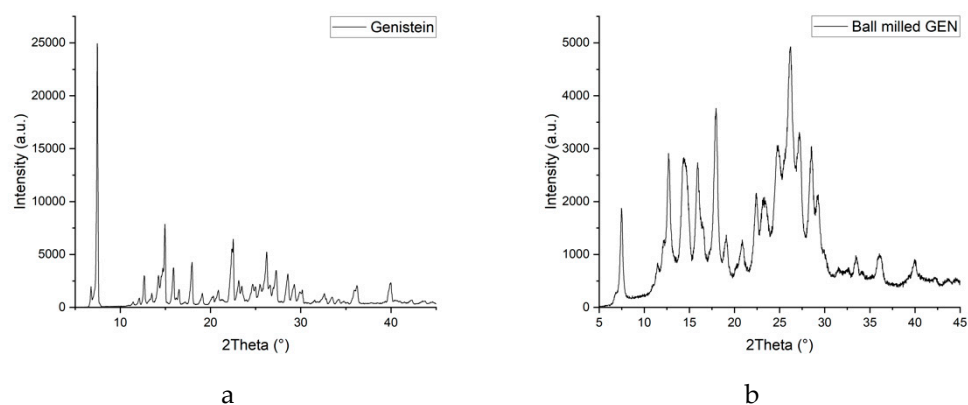

Figure S2. The XRPD diffraction patterns of GEN (a) and ball-milled GEN (b).

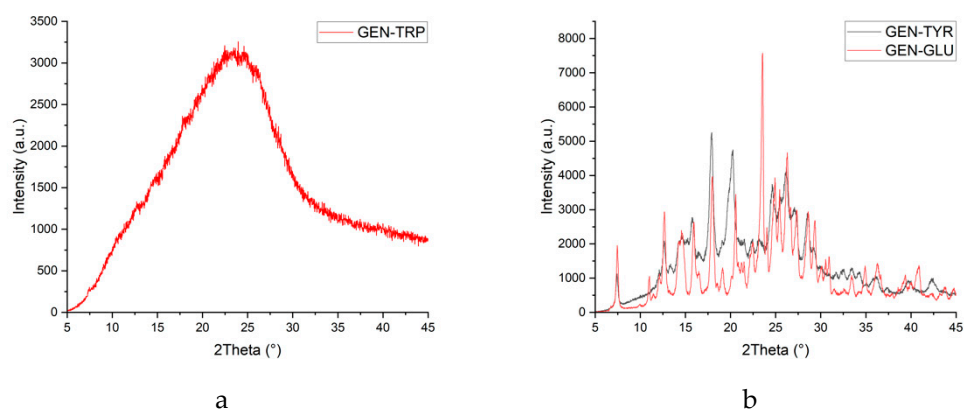

Figure S3. The XRPD diffraction patterns of ball-milled GEN with TRP (a), with TYR and with GLU (b).

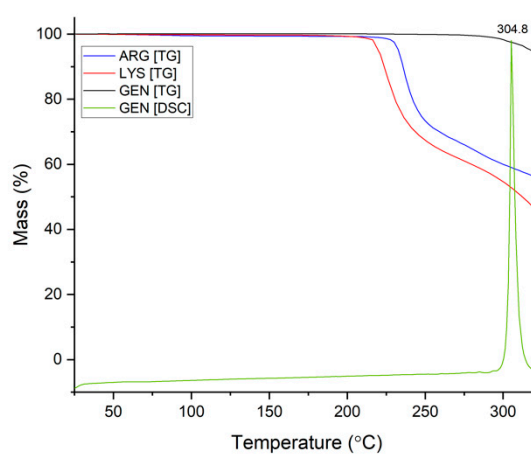

Figure S4. TG analysis of GEN, LYS, ARG and DSC thermogram of GEN.

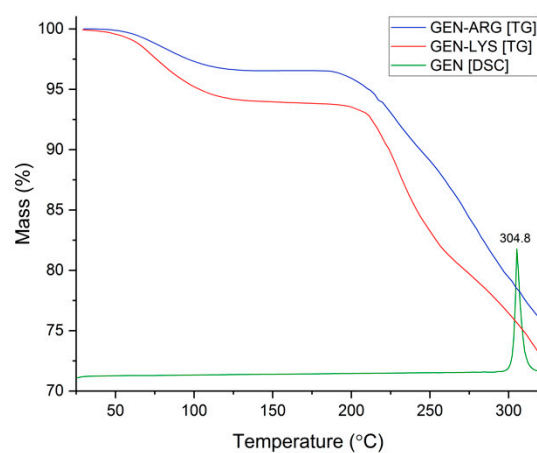

Figure S5. TG analysis of GEN-LYS and GEN-ARG co-amorphous systems and DSC thermogram of GEN.

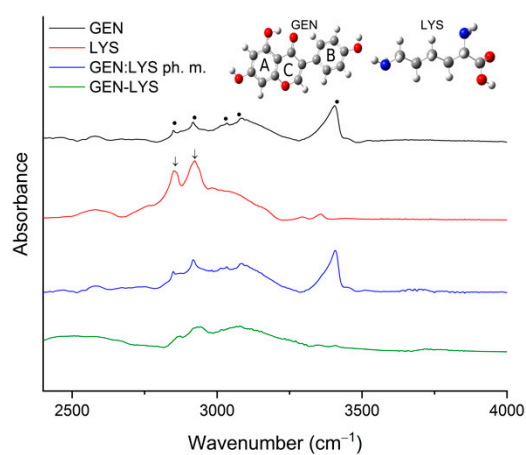

Figure S6. FT-IR spectra in the range of 2400-4000  $\text{cm}^{-1}$  of GEN (black line), LYS (red line), GEN:LYS physical mixture (blue line), GEN-LYS co-amorphous system (green line).

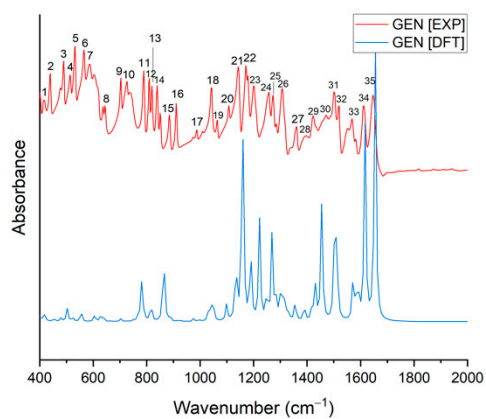

Figure S7. FT-IR experimental results compared with calculations obtained using basis set 6-311G(d,p).

Table S2. Selected characteristic bonds (in  $\text{cm}^{-1}$ ) of GEN and GEN-LYS co-amorphous system. Assignments of GEN bands were made based on DFT calculations with application of 6-31G(d,p) basis set and literature [1, 2].

|    | GEN  | GEN-LYS |                                                                                           |
|----|------|---------|-------------------------------------------------------------------------------------------|
| 1  | 416  | 426*    | C–C–C def. in B-ring                                                                      |
| 2  | 440  | •       | C4'–OH in plane b + C–C–C puck in C-ring + C–C–C def. in B- and C-ring                    |
| 3  | 490  | 492     | C–C–C def in A-, B- and C-ring                                                            |
| 4  | 513  |         | C–C–C def. in A- and C-ring                                                               |
| 5  | 532  | ↓       | C4'–OH and C1'–C3 oop b + C–C–C asymmetric torsion def. in B-ring                         |
| 6  | 565  | ↑       | C–C–C def in A- and C-ring + C5–OH and C4=O in plane b                                    |
| 7  | 586  | •       | C–C–C in plane b and C=C oop b in A-ring + C5–OH oop b                                    |
| 8  | 644  | 650     | C–C–C def. in B-ring                                                                      |
| 9  | 704  |         | C–C–C puck in A-ring + C5–OH oop b                                                        |
| 10 | 725  | 727*    | C–C–C puck in B-ring + C4'–OH and C1'–C3 oop b                                            |
| 11 | 789  | 786     | C–C–C in plane b in A- and C-ring + C–C in C-ring and C4=O oop b                          |
| 12 | 810  | •       | C–H oop b at A-ring + C–C–C puck in A-ring + C7–OH oop b                                  |
| 13 | 820  | •       | C=C in B-ring and C4'–OH oop b + C–C–C def. in B-ring + C–C–C in B- and C-ring in plane b |
| 14 | 839  | *       | C–H at B-ring and C4'–OH oop b + asymmetric torsion def. C–C–C in B-ring                  |
| 15 | 885  | 880     | C–C–C def. and in plane b in C-ring + C=C oop b in A-ring                                 |
| 16 | 910  | •       | C2–H oop b                                                                                |
| 17 | 987  | •       | C=C oop b in A-ring + C–C–C in plane b in A-ring                                          |
| 18 | 1041 | 1035*   | C=C in B-ring and O1–C2 oop b                                                             |
| 19 | 1064 | 1059    | O1–C9 oop b + C–C–C in plane b in A-ring                                                  |
| 20 | 1107 |         | C–H in plane b in B-ring + C=C oop b in B-ring                                            |
| 21 | 1141 | 1144    | C–H in plane b at A-ring + C7–OH oop b                                                    |
| 22 | 1171 | 1173*   | C–H in plane b at B-ring                                                                  |
| 23 | 1200 | *       | O1–C2 and C–C in C-ring oop b + C–H in plane b at A-ring                                  |
| 24 | 1257 | •       | C3–C1' and O1–C2 oop b                                                                    |
| 25 | 1273 | •       | C4'–OH oop b + C–C–C in plane b in B-ring                                                 |
| 26 | 1305 | ↓       | C=C oop b in A-ring                                                                       |
| 27 | 1360 | •       | C2=C3 oop b + C2–H in plane b                                                             |
| 28 | 1396 | •       | C=C oop b in A-ring                                                                       |
| 29 | 1423 | •       | C–C oop b in C-ring + 5–OH in plane b                                                     |
| 30 | 1472 | •       | C=C oop b in A-ring + C4=O oop b                                                          |
| 31 | 1500 | 1487↓   | C–H at A-ring and 5–OH in plane b + C=C oop b in A-ring                                   |
| 32 | 1518 | 1512    | C=C in B-ring oop b + C–H in plane b at B-ring                                            |
| 33 | 1568 | •       | C=C in A-ring and C2=C3 oop b                                                             |
| 34 | 1611 | 1609↓   | C=C in B-ring and C2=C3 oop b                                                             |
| 35 | 1647 | 1651    | C=C s in A-ring + 5–OH def.                                                               |
| 36 | 2849 | •       | O–H s                                                                                     |
| 37 | 2918 | •       |                                                                                           |
| 38 | 3034 | •       |                                                                                           |
| 39 | 3086 | •       |                                                                                           |
| 40 | 3406 | •       |                                                                                           |

Legend: \* – band shape change, ↓ – band intensity decrease, • – full disappearance of band, b – bending, def. – deformation, oop b – out of plane bending, puck – puckering, s – stretching, A, B, C

– name of GEN's ring. Carbon atom numbers and localization of A, B and C ring in GEN are depicted in Figure S8.

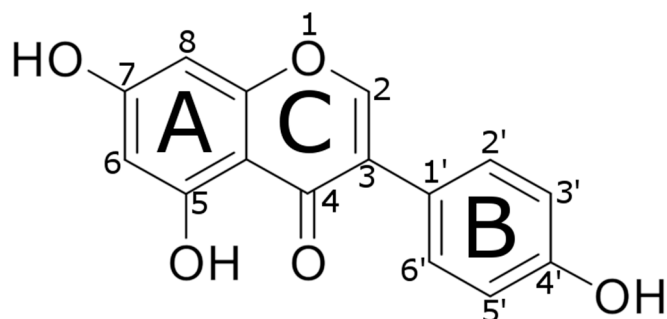

Figure S8 Chemical structure with atom numbering of GEN.

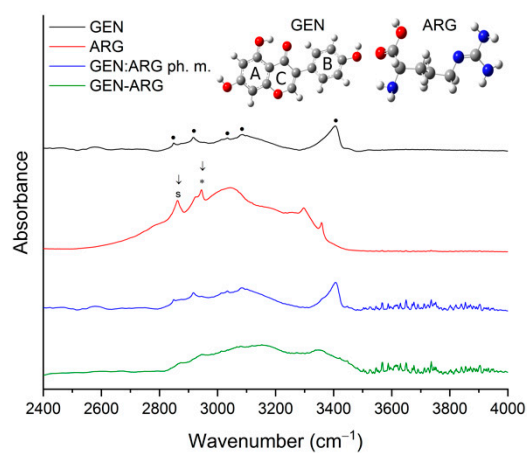

Figure S9. FT-IR spectra in the range of 2400-4000  $\text{cm}^{-1}$  of GEN (black line), ARG (red line), GEN:ARG physical mixture (blue line), GEN-ARG co-amorphous system (green line).

Table S3. Selected characteristic bonds (in  $\text{cm}^{-1}$ ) of GEN and GEN-ARG co-amorphous system. Assignments of GEN bands were made based on DFT calculations with application of 6-31G(d,p) basis set and literature [1, 2].

|    | GEN  | GEN-ARG |                                                                                           |
|----|------|---------|-------------------------------------------------------------------------------------------|
| 1  | 416  | *       | C–C–C def. in B-ring                                                                      |
| 2  | 440  | •       | C4'–OH in plane b + C–C–C puck in C-ring + C–C–C def. in B- and C-ring                    |
| 3  | 490  | 492↓    | C–C–C def in A-, B- ad C-ring                                                             |
| 4  | 513  |         | C–C–C def. in A- and C-ring                                                               |
| 5  | 532  | 530↓    | C4'–OH and C1'–C3 oop b + C–C–C asymmetric torsion def. in B-ring                         |
| 6  | 565  | 563     | C–C–C def in A- and C-ring + C5–OH and C4=O in plane b                                    |
| 7  | 586  | •       | C–C–C in plane b and C=C oop b in A-ring + C5–OH oop b                                    |
| 8  | 644  | 650     | C–C–C def. in B-ring                                                                      |
| 9  | 704  | 702↓    | C–C–C puck in A-ring + C5–OH oop b                                                        |
| 10 | 725  | ↓       | C–C–C puck in B-ring + C4'–OH and C1'–C3 oop b                                            |
| 11 | 789  | 785↓    | C–C–C in plane b in A- and C-ring + C–C in C-ring and C4=O oop b                          |
| 12 | 810  | •       | C–H oop b at A-ring + C–C–C puck in A-ring + C7–OH oop b                                  |
| 13 | 820  | •       | C=C in B-ring and C4'–OH oop b + C–C–C def. in B-ring + C–C–C in B- and C-ring in plane b |
| 14 | 839  | *       | C–H at B-ring and C4'–OH oop b + asymmetric torsion def. C–C–C in B-ring                  |
| 15 | 885  | 881↓    | C–C–C def. and in plane b in C-ring + C=C oop b in A-ring                                 |
| 16 | 910  | •       | C2–H oop b                                                                                |
| 17 | 987  | •       | C=C oop b in A-ring + C–C–C in plane b in A-ring                                          |
| 18 | 1041 | 1036*   | C=C in B-ring and O1–C2 oop b                                                             |
| 19 | 1064 | 1057    | O1–C9 oop b + C–C–C in plane b in A-ring                                                  |
| 20 | 1107 | ↓       | C–H in plane b in B-ring + C=C oop b in B-ring                                            |
| 21 | 1141 | 1148*   | C–H in plane b at A-ring + C7–OH oop b                                                    |
| 22 | 1171 | 1173*   | C–H in plane b at B-ring                                                                  |
| 23 | 1200 | •       | O1–C2 and C–C in C-ring oop b + C–H in plane b at A-ring                                  |
| 24 | 1257 | •       | C3–C1' and O1–C2 oop b                                                                    |
| 25 | 1273 | •       | C4'–OH oop b + C–C–C in plane b in B-ring                                                 |
| 26 | 1305 | *↓      | C=C oop b in A-ring                                                                       |
| 27 | 1360 | *       | C2=C3 oop b + C2–H in plane b                                                             |
| 28 | 1396 | •       | C=C oop b in A-ring                                                                       |
| 29 | 1423 | •       | C–C oop b in C-ring + 5–OH in plane b                                                     |
| 30 | 1472 |         | C=C oop b in A-ring + C4=O oop b                                                          |
| 31 | 1500 | 1489↓   | C–H at A-ring and 5–OH in plane b + C=C oop b in A-ring                                   |
| 32 | 1518 | 1508    | C=C in B-ring oop b + C–H in plane b at B-ring                                            |
| 33 | 1568 | •       | C=C in A-ring and C2=C3 oop b                                                             |
| 34 | 1611 | ↓       | C=C in B-ring and C2=C3 oop b                                                             |
| 35 | 1647 | *       | C=C s in A-ring + 5–OH def.                                                               |
| 36 | 2849 | •       | O–H s                                                                                     |
| 37 | 2918 | •       |                                                                                           |
| 38 | 3034 | •       |                                                                                           |
| 39 | 3086 | •       |                                                                                           |
| 40 | 3406 | •       |                                                                                           |

Legend: \* – band shape change, ↓ – band intensity decrease, • – full disappearance of band, b – bending, def. – deformation, oop b – out of plane bending, puck – puckering, s – stretching, A, B, C



– name of GEN's ring. Carbon atom numbers and localization of A, B and C ring in GEN are depicted in Figure S10.

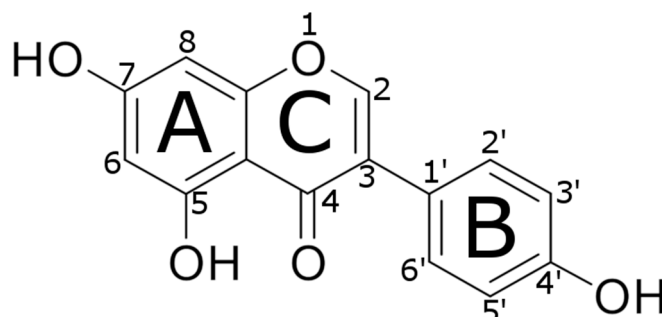

Figure S10. Chemical structure with atom numbering of GEN.

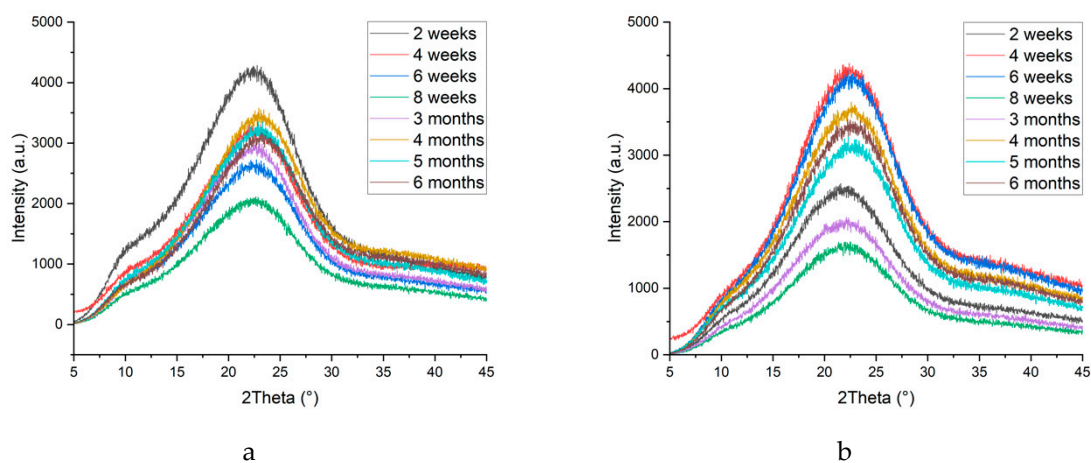

Figure S11. The XRPD diffraction patterns of stored GEN-LYS (a) and GEN-ARG (b) co-amorphous systems.

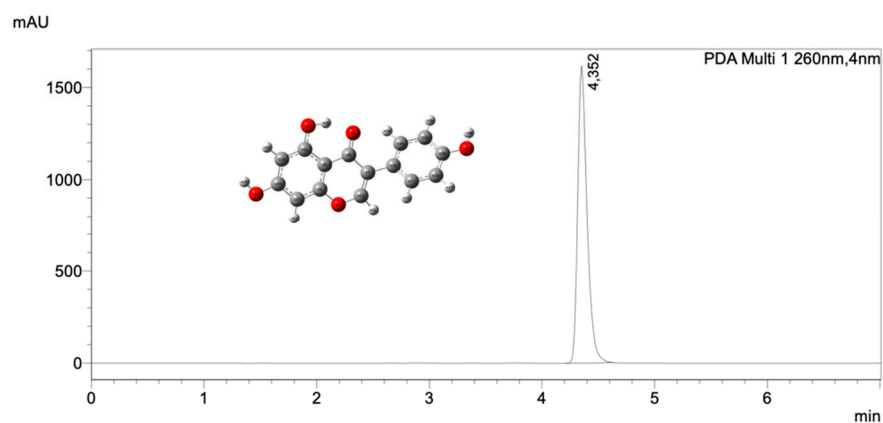

Figure S12. Chromatograms of GEN for the developed method.

Table S4. Validation parameters of HPLC-DAD method for concentration determination of GEN.

|                                        |                                 |
|----------------------------------------|---------------------------------|
| Linearity range (mg·mL <sup>-1</sup> ) | 0.00002-0.3                     |
| Correlation coefficient (r)            | 0.9989                          |
| a ± Sa                                 | 93757951.63 ± 1126555.206       |
| b ± Sb                                 | insignificant ( $\alpha=0.05$ ) |
| LOD (mg·mL <sup>-1</sup> )             | 0.0132                          |
| LOQ (mg·mL <sup>-1</sup> )             | 0.0401                          |
| Retention time (min)                   | 4.352                           |

## References:

1. Sekine, R.; Robertson, E. G.; McNaughton, D., Raman, infrared and computational analysis of genistein and its methoxy derivatives. *Vibrational Spectroscopy* **2011**, *57*, (2), 306-314.
2. Pawlikowska-Pawlega, B.; Misiak, L. E.; Zarzyka, B.; Paduch, R.; Gawron, A.; Gruszecki, W. I., Localization and interaction of genistein with model membranes formed with dipalmitoylphosphatidylcholine (DPPC). *Biochim Biophys Acta* **2012**, *1818*, (7), 1785-93.
